# Supplementary material for: Scenarios and methods that induce protruding or released CNTs after degradation of nanocomposite materials
Source: Springer Nature journal article supplement (doi:10.1007/s11051-013-1504-x), 2013-03-05

# Scenarios and methods that induce protruding or released CNTs after degradation of nanocomposite materials

## - Online Supporting Information

Sabine Hirth<sup>1</sup>, Lorenzo Cena<sup>2</sup>, Gerhard Cox<sup>1</sup>, Željko Tomović<sup>3</sup>, Thomas Peters\*<sup>4</sup>, Wendel Wohlleben\*<sup>1</sup>

<sup>1</sup> BASF SE, 67056 Ludwigshafen, Germany

Tel +49 621 60 95339

Email: [wendel.wohlleben@basf.com](mailto:wendel.wohlleben@basf.com)

<sup>2</sup> CDC/NIOSH, Morgantown, WV 26505 USA

<sup>3</sup> BASF Polyurethanes GmbH, GMU/UE, Elastogranstrasse 60, 49448 Lemfoerde, Germany

<sup>4</sup> The University of Iowa, Iowa City, IA 52242 USA

Email: [thomas-m-peters@uiowa.edu](mailto:thomas-m-peters@uiowa.edu)

Fig. SI\_1 Overview of the release by the combined action of weathering and mechanical methods, on the example of a TPU+CNT composite. Higher resolution TEM scans of characteristic individual fragments are shown in Fig. 7 c) – h) in the main text. Here we provide unfractionated TEM scans of the polydisperse and polymorph fragments of released material after UV-only weathering with c') shaker, d') ultrasound bath, e') ultrasound probe. Analogously, TEM images after UV+rain weathering and f') shaker, g') ultrasound bath, h') ultrasound probe.

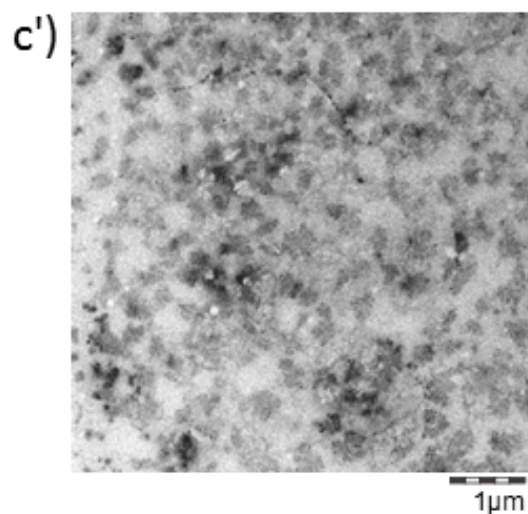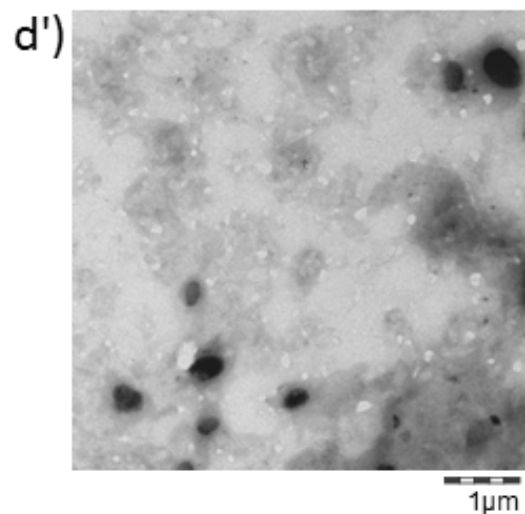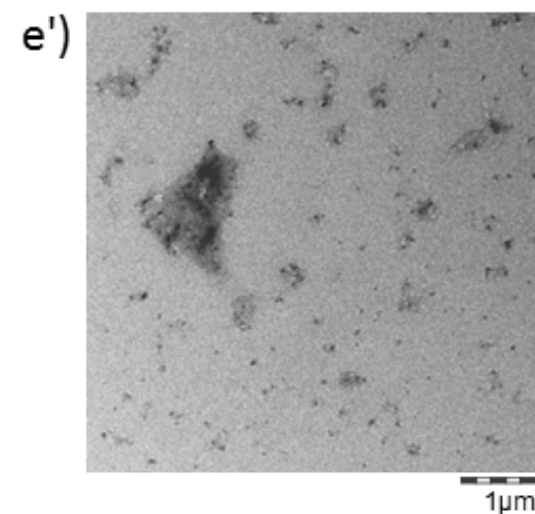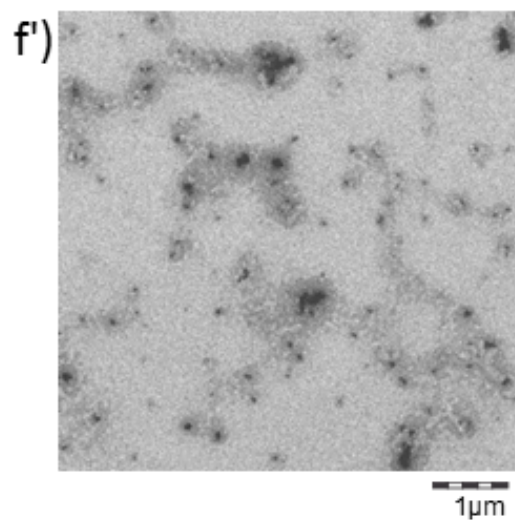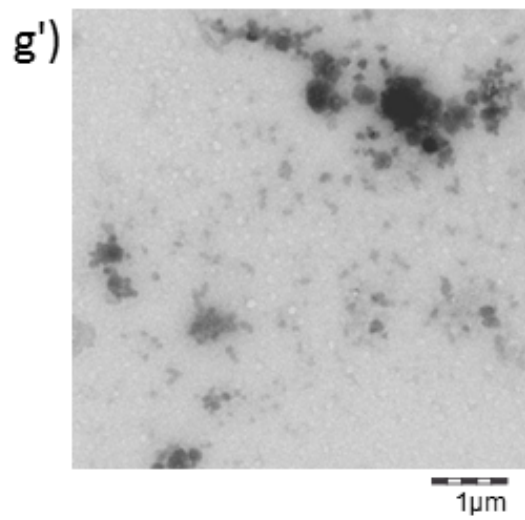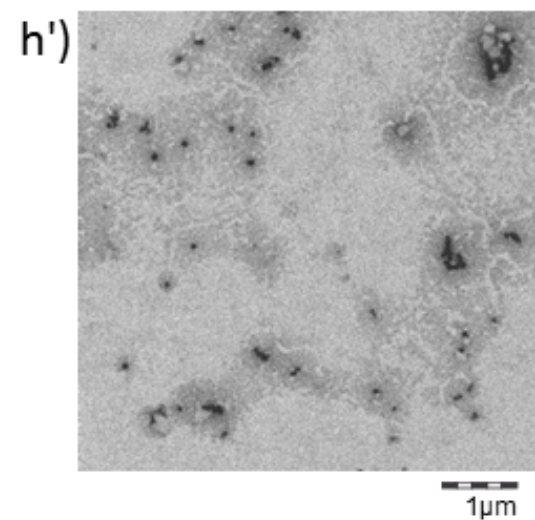

Supplement: MOESM1 [file 5654924]
